# Supplementary material for: Assessment of plum rain’s impact on power system emissions in Yangtze-Huaihe River basin of China
Source: PubMed Central journal article supplement (PMC8545941; doi:10.1038/s41467-021-26358-w), 2021-10-25
Supplement: 41467_2021_26358_MOESM3_ESM.pdf [file 41467_2021_26358_MOESM3_ESM.pdf]

The full content of this file cannot be displayed with your current PDF viewer. Please update to the latest possible version to view this document.
